# Supplementary material for: New Ciders Made by an Exhaustion Method: An Option to Val-Orise Subproducts from the Making of Ice Ciders
Source: MDPI journal article supplement (doi:10.3390/beverages7040075), 2021-11-12
Supplement: s1 [file s1]

**Table S1.** Ranges of concentration in each harvest (Minimum-Maximum) of volatile compounds in ciders made by the Exhaustion and Cryo-extraction methods, obtained by fermentation with the *Saccharomyces bayanus* yeast strain (C6).

| Major volatiles (mg/L)            | Sy  | J   | H   | Exhaustion    |               | Cryo-extraction |               |
|-----------------------------------|-----|-----|-----|---------------|---------------|-----------------|---------------|
|                                   |     |     |     | H1            | H2            | H1              | H2            |
| Ethyl acetate                     | ns  | ns  | **  | 42.0 – 52.3   | 46.9 – 60.1   | 45.0 – 51.1     | 42.9 – 55.6   |
| Methanol                          | ns  | **  | **  | 41.4 – 54.6   | 29.9 – 43.8   | 31.8 – 55.1     | 28.8 – 61.4   |
| 1-Propanol                        | ns  | *   | *** | 21.8 – 25.5   | 16.2 – 21.0   | 18.7 – 21.4     | 9.7 – 22.0    |
| <i>Iso</i> -butanol               | ns  | ns  | *** | 42.4 – 48.9   | 25.7 – 33.5   | 29.8 – 43.8     | 28.5 – 41.3   |
| 1-butanol                         | ns  | *** | *   | 2.7 – 5.6     | 3.1 – 6.2     | 2.4 – 7.5       | 3.5 – 7.9     |
| Amyl alcohols                     | ns  | ns  | *** | 300.4 – 317.4 | 215.6 – 236.2 | 276.7 – 370.3   | 252.6 – 301.3 |
| 2-Phenylethanol                   | *** | **  | ns  | 55.3 – 154.9  | 56.8 – 69.3   | 82.3 – 146.9    | 80.9 – 176.6  |
| <b>Minor volatiles (µg/L IS)</b>  |     |     |     |               |               |                 |               |
| Minor alcohols + Volatile phenols |     |     |     |               |               |                 |               |
| Hexanol                           | *** | ns  | ns  | 0.5 – 0.7     | 0.4 – 0.5     | 0.7 – 1.1       | 0.8 – 1.2     |
| 1-Octanol                         | *** | *   | **  | 0.1 – 0.2     | 0.2 – 0.3     | 0.2 – 0.4       | 0.3 – 0.4     |
| 4-vinylguaiaicol                  | **  | *** | ns  | 0.5 – 1.9     | 0.4 – 2.0     | 0.7 – 6.8       | 0.8 – 4.4     |
| 4-vinylphenol                     | **  | *** | ns  | 0.3 – 1.0     | 0.1 – 0.6     | 0.4 – 2.6       | 0.3 – 1.9     |
| <u>Esters</u>                     |     |     |     |               |               |                 |               |
| Ethyl butyrate                    | *** | ns  | ns  | 0.4 – 0.8     | 1.1 – 1.8     | 1.6 – 3.3       | 1.4 – 2.7     |
| Ethyl-2-methylbutyrate            | **  | ns  | ns  | 0.6 – 1.4     | 1.2 – 2.9     | 1.5 – 2.3       | 1.3 – 2.7     |
| Ethyl-3-methylbutyrate            | *** | ns  | ns  | 0.1 – 0.4     | 0.2 – 0.2     | 0.3 – 0.6       | 0.2 – 0.4     |
| Ethyl valerate                    | *   | *** | ns  | 0.1 – 0.2     | 0.1 – 0.4     | 0.1 – 0.4       | 0.2 – 0.5     |
| Ethyl hexanoate                   | *** | *   | ns  | 6.8 – 18.4    | 11.2 – 32.2   | 25.5 – 46.9     | 12.4 – 36.8   |
| Ethyl octanoate                   | *** | ns  | ns  | 62.4 – 155.5  | 156.6 – 226.7 | 278.4 – 472.9   | 262.8 – 445.5 |
| Ethyl nonanoate                   | *** | ns  | **  | 0.1 – 0.3     | 0.3 – 0.4     | 0.5 – 0.7       | 0.8 – 1.5     |
| Ethyl decanoate                   | *** | ns  | *   | 61.9 – 161.4  | 157.6 – 218.6 | 211.01 – 430.4  | 322.2 – 364.9 |
| Ethyl benzoate                    | **  | **  | ns  | 1.7 – 4.1     | 2.8 – 5.6     | 1.6 – 3.1       | 1.8 – 2.8     |
| Diethyl succinate                 | ns  | ns  | *** | 2.5 – 3.7     | 4.4 – 7.0     | 1.6 – 3.5       | 2.8 – 6.3     |
| Ethyl dodecanoate                 | *** | ns  | ns  | 7.0 – 29.7    | 13.9 – 35.3   | 45.1 – 212.6    | 43.5 – 93.5   |
| Ethyl tetradecanoate              | *** | ns  | ns  | 1.6 – 8.7     | 3.2 – 7.6     | 32.1 – 151.5    | 14.6 – 67.5   |
| Ethyl cinnamate                   | ns  | *** | ns  | 0.5 – 0.9     | 0.5 – 1.7     | 0.5 – 0.7       | 0.4 – 1.0     |
| Ethyl hexadecanoate               | *** | ns  | ns  | 5.1 – 8.2     | 5.1 – 10.3    | 16.9 – 47.4     | 12.0 – 29.8   |
| Ethyl oleate                      | ns  | ns  | *** | 0.9 – 3.2     | 0.2 – 1.0     | 0.9 – 1.7       | 0.5 – 1.3     |
| Isoamyl decanoate                 | *** | ns  | ns  | 0.7 – 1.3     | 1.5 – 2.0     | 3.0 – 12.9      | 3.4 – 8.3     |
| Isoamyl octanoate                 | *** | ns  | ns  | 0.9 – 2.2     | 2.7 – 4.1     | 4.4 – 12.1      | 5.7 – 8.9     |
| Methyl octanoate                  | *** | ns  | **  | 0.1 – 0.2     | 0.3 – 0.5     | 0.4 – 0.5       | 0.3 – 1.1     |
| Methyl decanoate                  | *** | ns  | ns  | 0.1 – 0.2     | 0.2 – 0.3     | 0.2 – 0.5       | 0.3 – 0.8     |
| Isoamylethyl succinate            | *   | ns  | **  | 1.3 – 1.5     | 1.2 – 1.7     | 1.1 – 1.5       | 1.6 – 2.5     |
| Ethylphenyl acetate               | ns  | *** | **  | 1.3 – 2.3     | 1.7 – 3.3     | 1.4 – 3.2       | 1.3 – 4.5     |
| Isoamyl acetate                   | *** | ns  | ns  | 4.8 – 12.7    | 6.4 – 13.1    | 15.6 – 145.2    | 9.3 – 21.5    |
| 2-Phenylethyl acetate             | ns  | ns  | *** | 6.3 – 34.8    | 1.8 – 4.2     | 4.8 – 115.5     | 4.9 – 9.6     |
| <u>Fatty acids</u>                |     |     |     |               |               |                 |               |
| Hexanoic                          | **  | ns  | *** | 0.6 – 0.8     | 1.8 – 2.5     | 1.2 – 2.1       | 2.2 – 2.7     |
| Octanoic                          | *** | ns  | *** | 9.7 – 13.7    | 37.6 – 55.2   | 34.0 – 55.5     | 55.8 – 67.2   |
| Decanoic                          | **  | ns  | *** | 16.1 – 26.0   | 51.1 – 63.8   | 37.4 – 53.0     | 64.8 – 69.5   |
| Dodecanoic                        | *** | ns  | ns  | 0.7 – 2.3     | 1.3 – 2.2     | 3.1 – 10.1      | 3.5 – 6.9     |

Sy: system; J: juice; H: harvest; IS: internal standard (2-ethyl-1-hexanol); ns: not significant; (\*): significant at  $p < 0.10$ ; (\*\*): significant at  $p < 0.05$ ; (\*\*\*): significant at  $p < 0.01$ .
